# Supplementary material
Source: PubMed Central journal article supplement (PMC4019222)

1 **Supplemental Figures**

2 **Supplemental Figure 1. Repetitive DE exposure does not induce Foxp3 expression of CD4<sup>+</sup>**

3 **T cells.** C57BL/6 mice were repetitively exposed to DE and saline for 3 wk, and CD4<sup>+</sup> T cells  
4 pooled from 3 animals were isolated from lung tissue by FACS and immediately *ex vivo*  
5 stimulated with PMA+ ionomycin for 4 hours, and stained for Foxp3. As an additional control,  
6 CD4<sup>+</sup> T cells from saline and DE-treated mice were not *ex vivo* stimulated, but stained for  
7 Foxp3. A representative contour plot depicting Foxp3 staining for one of three independent  
8 experiments is shown.

9

10 **Supplemental Figure 2. Repetitive DE exposure does not induce IFN- $\gamma$  and IL-17**

11 **production of CD8<sup>+</sup> T cells.** C57BL/6 mice were repetitively exposed to DE and saline for 3  
12 wk, and CD8<sup>+</sup> T cells pooled from 3 animals were isolated from lung tissue by FACS and  
13 immediately stimulated with PMA + ionomycin for 4 hours, and stained for IL-17 and IFN- $\gamma$  to  
14 demonstrate cytokine profiles. A representative contour plot depicting cytokine staining for one  
15 of three independent experiments is shown. Left column depicts background or isotype staining  
16 for each respective cytokine. Middle and right column depict saline- and DE-treated mice,  
17 respectively.

18

19 **Supplemental Figure 3. PGN exposure induces a Th1/17-polarized cytokine response in the**

20 **whole lung.** Cytokine profiles associated with T cell subsets were analyzed from cell-free  
21 supernatants of total lung homogenates from C57BL/6 mice repetitively exposed with PGN (100  
22  $\mu\text{g}$  and 10  $\mu\text{g}$ ) or saline (PGN 0  $\mu\text{g}$ ) for 3 weeks. Results represent the mean  $\pm$  SEM of six mice  
23 from two independent experiments with statistical significance denoted by asterisk (\* $p < 0.05$ ) as  
24 compared to saline (PGN 0  $\mu\text{g}$ ).

**Supplemental Figure 1**

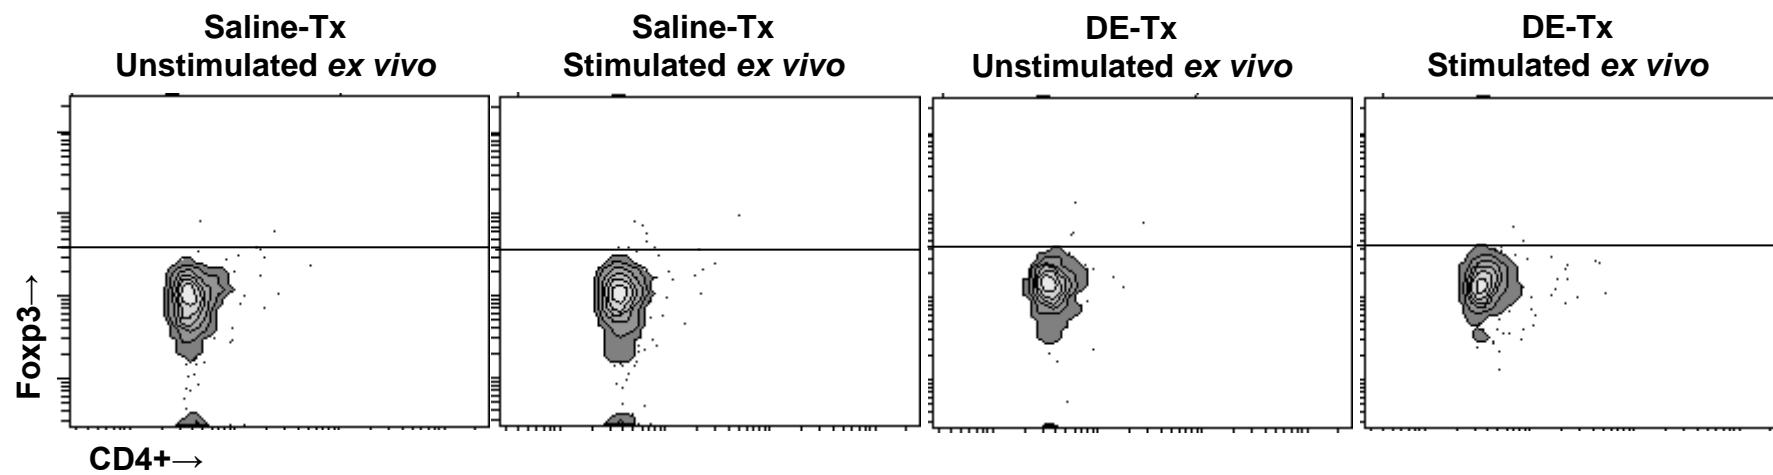

Supplemental Figure 2

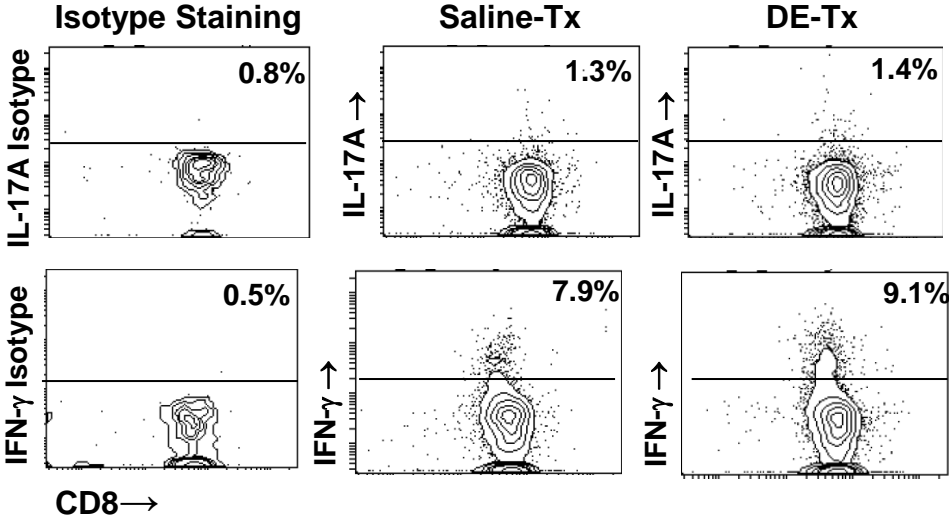

Supplemental Figure 3

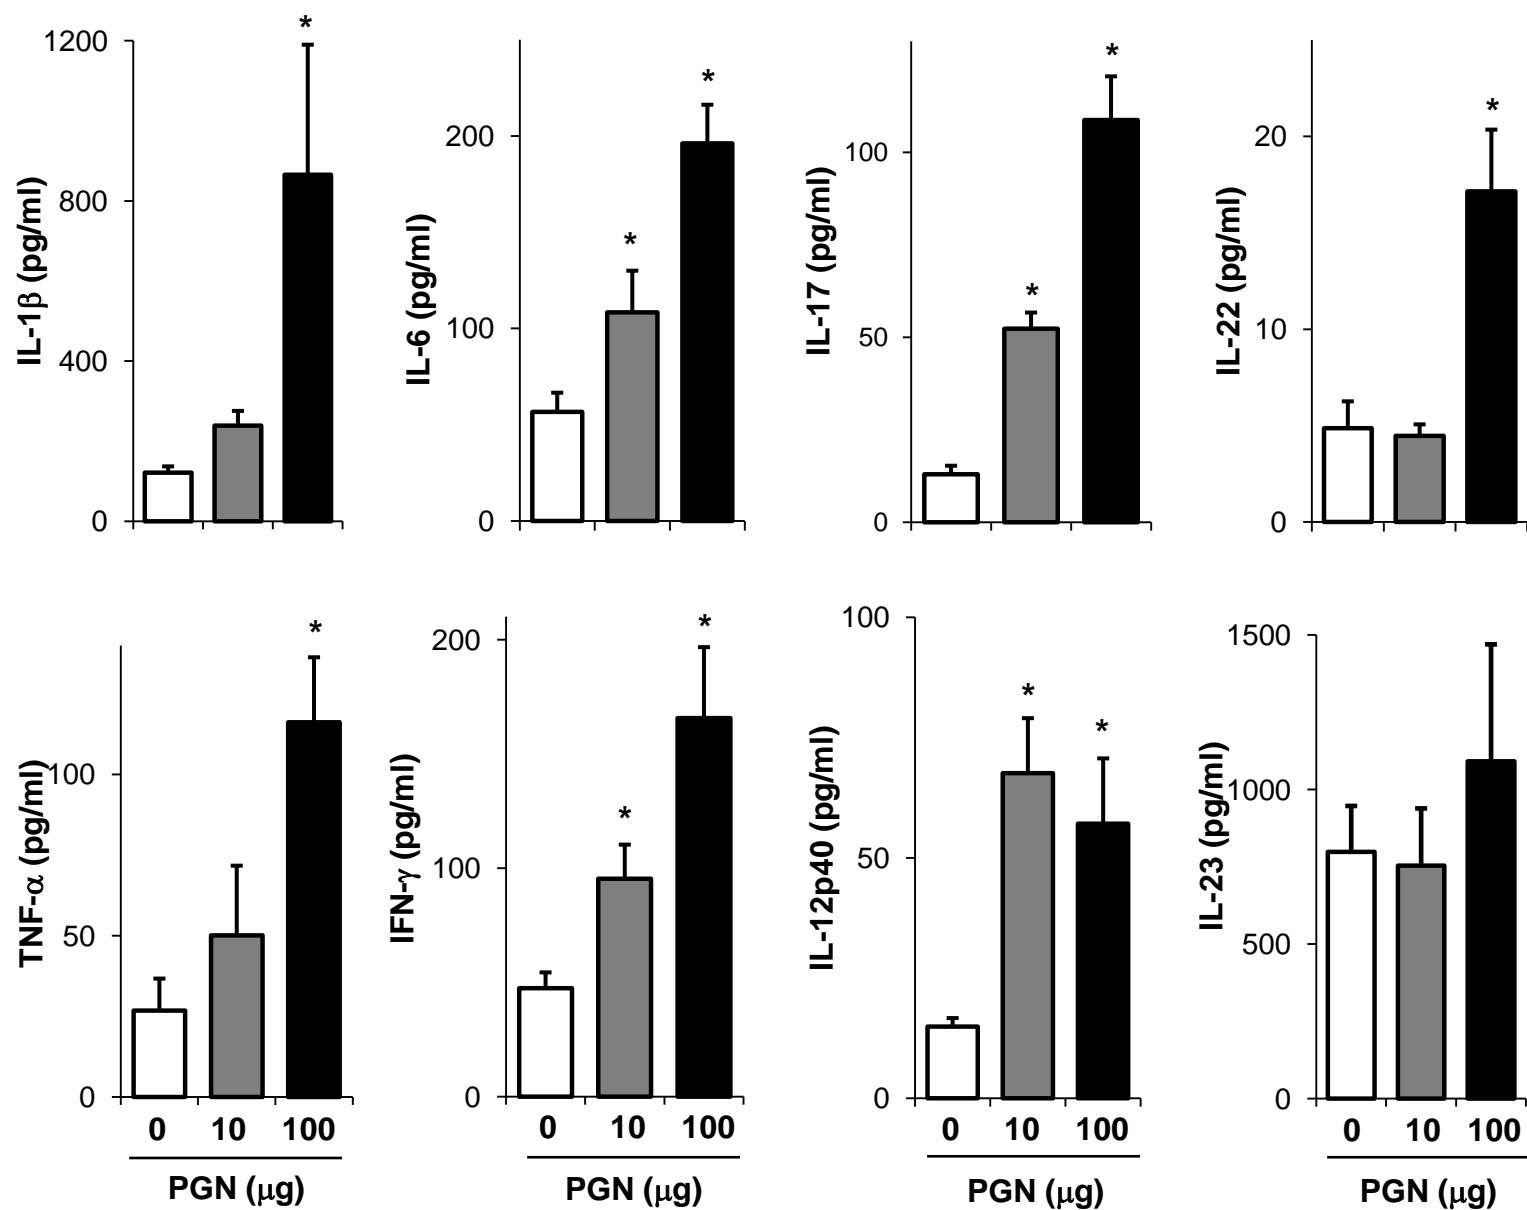

Supplement: NIHMS491739-supplement-supplement_1.pdf [file NIHMS491739-supplement-supplement_1.pdf]
